# Supplementary material for: Klf5 suppresses ERK signaling in mouse pluripotent stem cells
Source: PubMed Central journal article supplement (PMC6242311; doi:10.1371/journal.pone.0207321), 2018-11-19

# S1 Fig

Uncropped western blot images for all figures as indicated.

## Fig. 1C

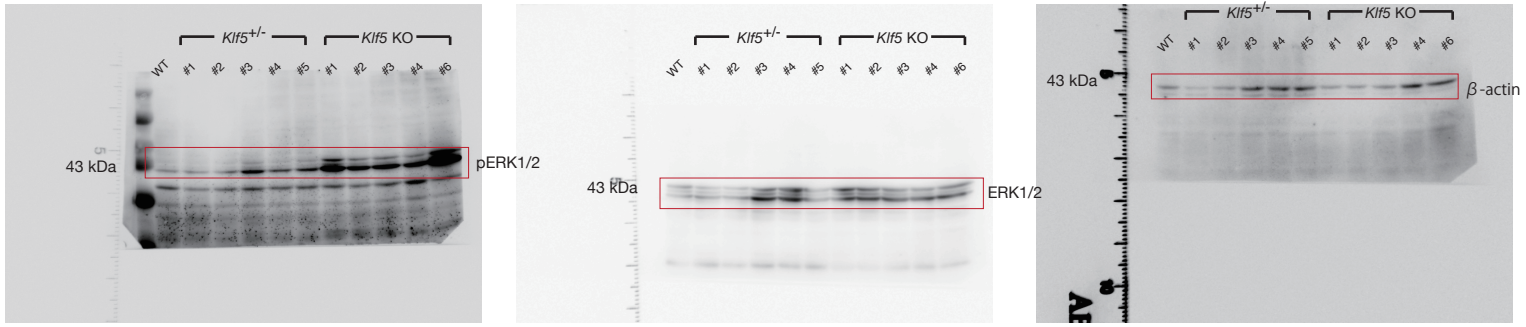

## Fig. 2A

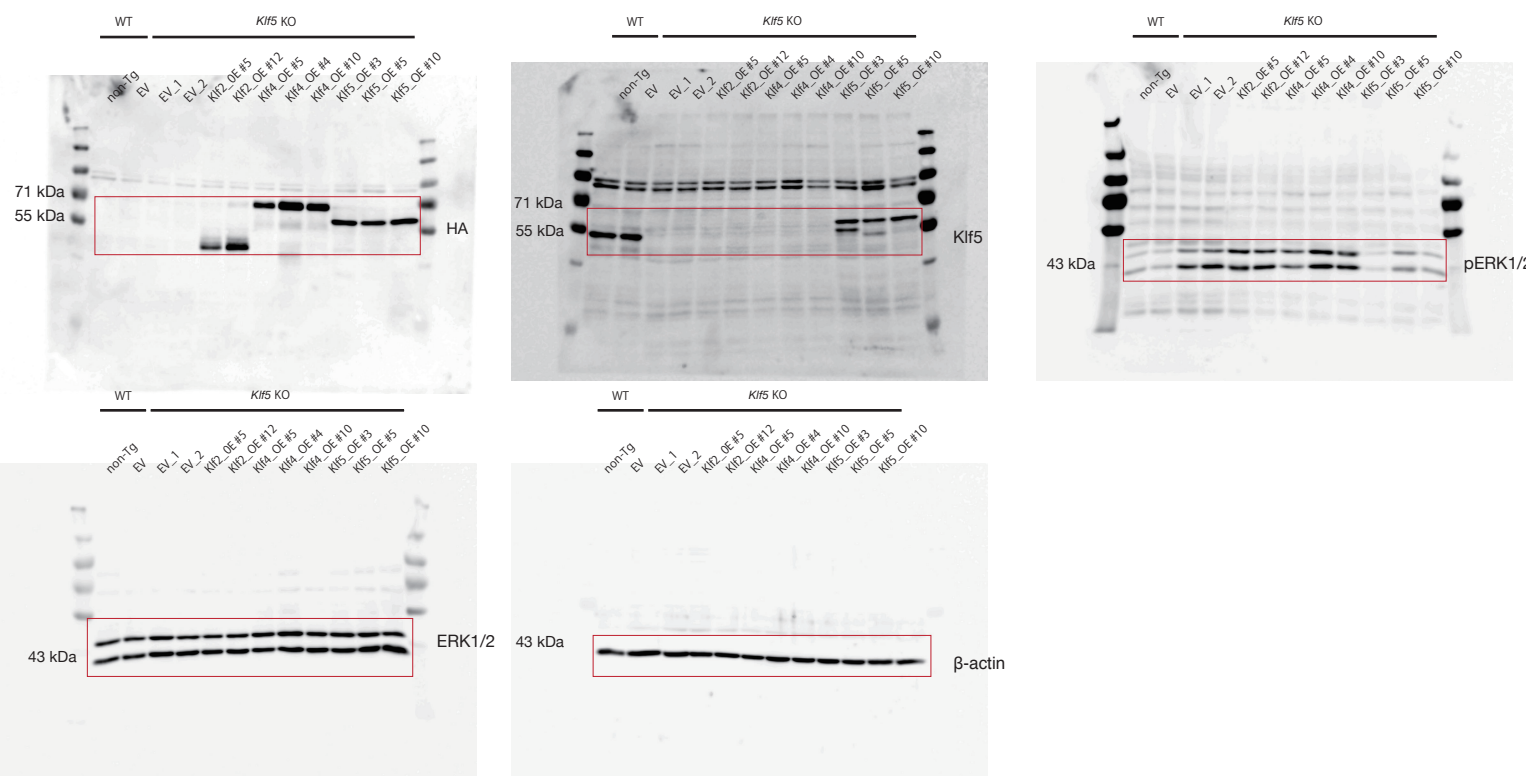

## Fig. 2C

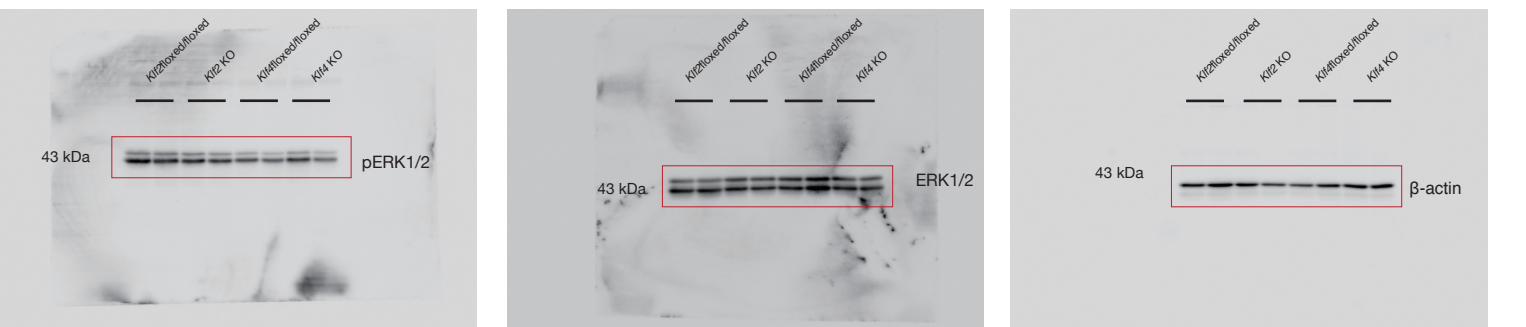

Supplement: pone.0207321.s001.pdf [file pone.0207321.s001.pdf]
