# Supplementary material for: Klf5 suppresses ERK signaling in mouse pluripotent stem cells
Source: PubMed Central journal article supplement (PMC6242311; doi:10.1371/journal.pone.0207321), 2018-11-19
Supplement: pone.0207321.s003.pdf [file pone.0207321.s003.pdf]

## **S1 Table: List of antibodies**

| <b>Primary Antibody</b>  | <b>Supplier</b>           | <b>Catalogue Number</b> | <b>Dilution</b>       |
|--------------------------|---------------------------|-------------------------|-----------------------|
| rabbit anti-pERK1/2      | Cell Signaling Technology | #9101                   | 1:1000                |
| rabbit anti-ERK1/2       | Cell Signaling Technology | #9102                   | 1:2000                |
| rat anti-HA              | Roche                     | 1867423001              | 1:2000                |
| anti-FLAG-M2             | sigma                     | F1804                   | 1:250                 |
| anti- $\beta$ -actin HRP | MBL                       | PM053-7                 | 1:5000                |
| rat anti-Klf5            | Kyowa KIRIN               | a gift from Dr. Nagai   | WB; 1:1000, IF; 1:300 |
| rabbit anti-Klf2         | Millipore                 | 09-820                  | 1:1000                |
| rabbit anti-Klf4         | abcam                     | ab215036                | 1:1000                |

Azami et al.,
