# Supplementary material for: Klf5 suppresses ERK signaling in mouse pluripotent stem cells
Source: PubMed Central journal article supplement (PMC6242311; doi:10.1371/journal.pone.0207321), 2018-11-19
Supplement: pone.0207321.s004.pdf [file pone.0207321.s004.pdf]

**S2 Table: List of qRT-PCR primers sequences**

| <b>Gene</b>    | <b>Primer Sequence (Forward)</b> | <b>Primer Sequence (Reverse)</b> |
|----------------|----------------------------------|----------------------------------|
| Spred1         | TTAGCTGCATGCTCTGTGCT             | ACAGCGATGGCACATTCTCA             |
| Egr1           | TTGTGGCCTGAACCCCTTTT             | AGATGGGACTGCTGTCGTTG             |
| Dusp1          | GGGAGCTGGTCCTTATTTATTTAAC        | CTCAAACAGAGTCCTTTCTCTTCTG        |
| Nanog          | ACAGGTTTCAGAAGCAGAAGTACC         | AATCAGACCATTGCTAGTCTTCAAC        |
| Oct3/4         | TATTGAGTATTCCAACGAGAAGAG         | CTCAGGAAAAGGGACTGAGTAGAGT        |
| Sox2           | CATGAGAGCAAGTACTGGCAAG           | CCAACGATATCAACCTGCATGG           |
| Klf2           | GCGTACACACACAGGTGAGA             | GCACAAGTGGCACTGAAAGG             |
| Klf4           | TACCCCTACACTGAGTCCCG             | GGAAAGGAGGGTAGTTGGGC             |
| Klf5           | CGATTCACAACCCAAATTTACC           | GTATGAGTCCTCAGGTGAGCTTTTA        |
| Esrrb          | GGACTATATCATGGATGAGGAACAC        | TTCTTCTCTACCTTGAGTTTCTTG         |
| Stella         | AGGCTCGAAGGAAATGAGTTTG           | TCCTAATTCTTCCCGATTTTCG           |
| Rex1           | TCCATGGCATAGTTCCAACAG            | TAACTGATTTTCTGCCGTATGC           |
| Brachyury      | ATCAGAGTCCTTTGCTAGGTAG           | GTTACAATCTTCTGGCTATGC            |
| Fgf5           | ACCCACTTCCTACCCAGGTT             | AGTTGTTTCCCACAAGGCCA             |
| $\beta$ -actin | CTGAGCGCAAGTACTCTGTGTG           | GTGTA AACGCAGCTCAGTAACAGT        |
