# Supplementary material for: Klf5 suppresses ERK signaling in mouse pluripotent stem cells
Source: PubMed Central journal article supplement (PMC6242311; doi:10.1371/journal.pone.0207321), 2018-11-19
Supplement: pone.0207321.s005.pdf [file pone.0207321.s005.pdf]

### **S3 Table: List of ChIP-qPCR primers sequences**

| <b>Gene</b> | <b>Primer Sequence (Forward)</b> | <b>Primer Sequence (Reverse)</b> |
|-------------|----------------------------------|----------------------------------|
| Spred1_1    | AGAAAGCTTGCCAACTGTGG             | GCTCTGGAGGTTGCTACTCG             |
| Spred1_2    | AACGTGACAGCTGCCTATCC             | TTACATGAATCTGGCGCATC             |
| Spred1_3    | CACTGAGCAGTACGGAGTGG             | GAGGGATATGTCGCTGCACT             |
